# Supplementary material
Source: PubMed Central journal article supplement (PMC2748135)

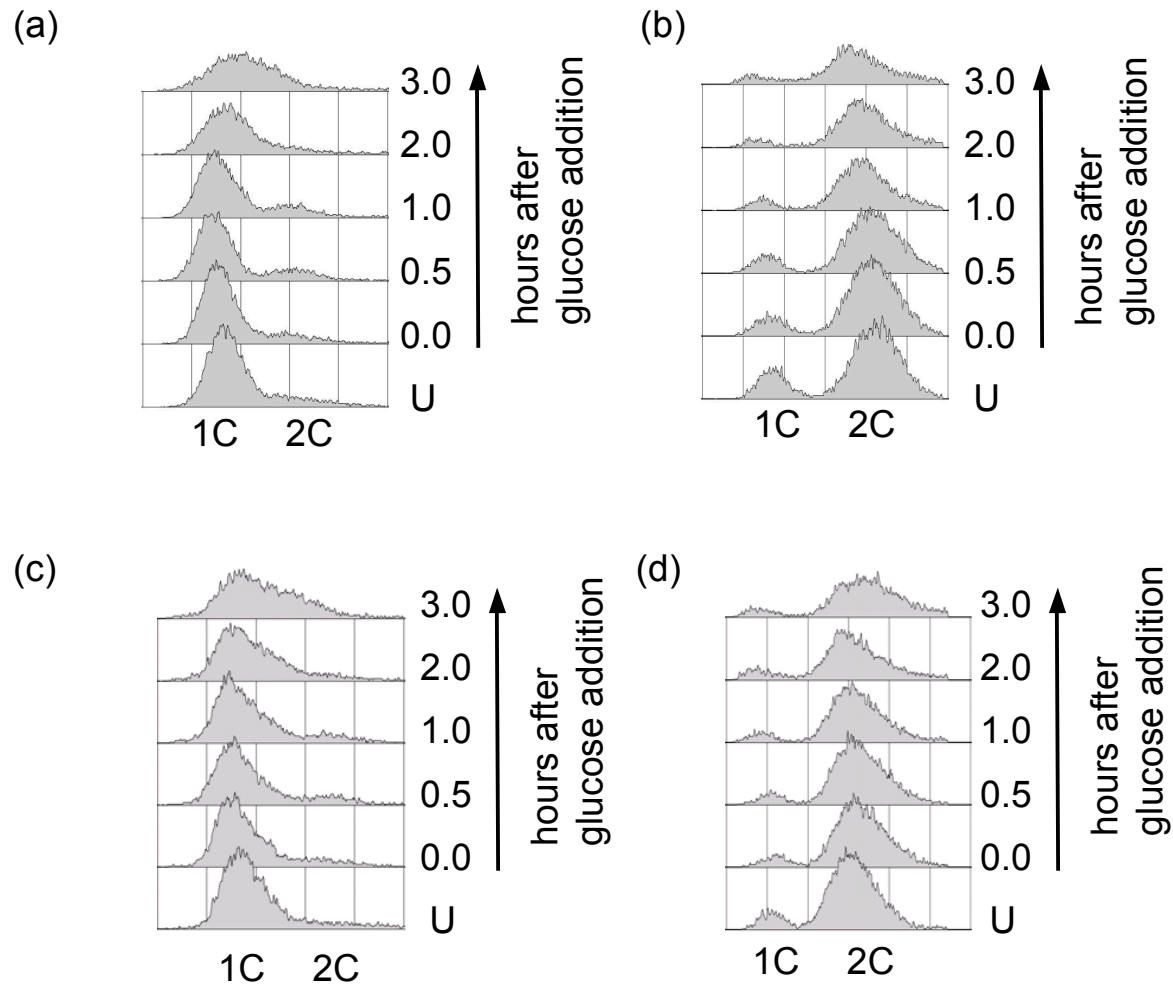

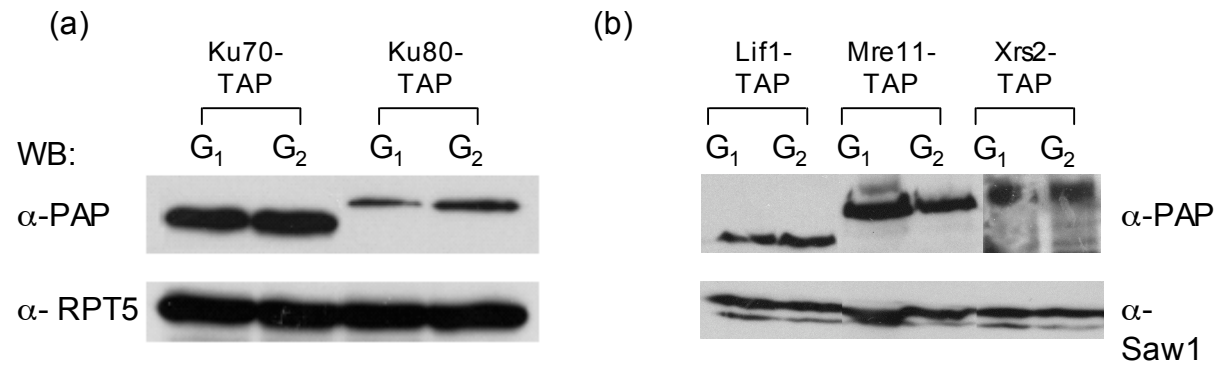

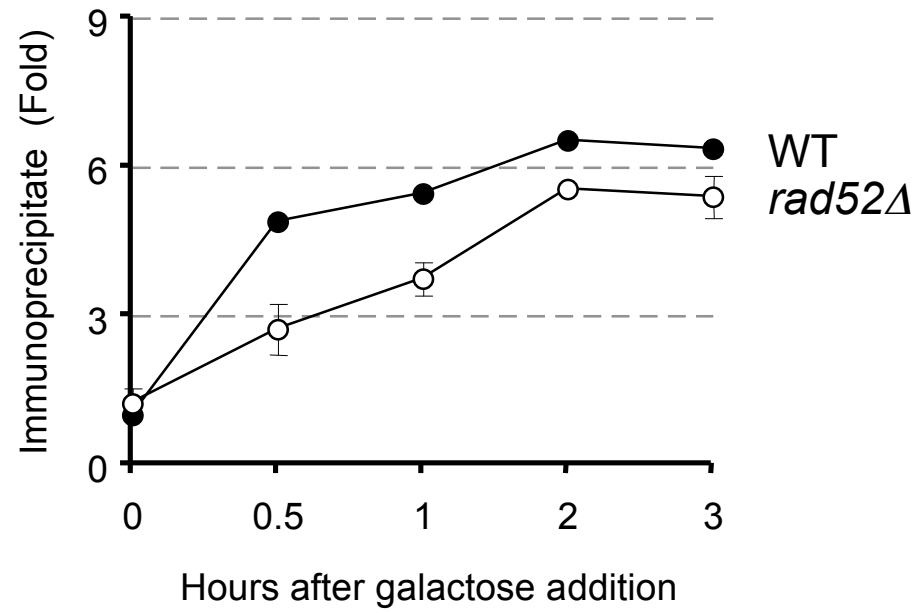

Supplement: NIHMS135946-supplement-01.pdf [file NIHMS135946-supplement-01.pdf]
